# Supplementary material
Source: PubMed Central journal article supplement (PMC9869399)
Supplement: NIHMS1863289-supplement-Supp__Table.pdf [file NIHMS1863289-supplement-Supp__Table.pdf]

**Supplementary Table 1.** Distribution of age in the study sample

|                     | 2011-2012  | 2013-2014  | 2015-2016  | 2017-2018  |
|---------------------|------------|------------|------------|------------|
| Total sample size   |            |            |            |            |
| Unweighted sample   | 2,706      | 2,783      | 2,827      | 3,076      |
| Weighted population | 25,213,630 | 25,902,862 | 27,188,841 | 28,490,297 |
| 50-54               |            |            |            |            |
| Unweighted sample   | 503        | 478        | 489        | 430        |
| Weighted population | 5,448,243  | 5,255,979  | 5,386,444  | 4,670,882  |
| Weighted column %   | 21.6%      | 20.3%      | 19.8%      | 16.4%      |
| 55-59               |            |            |            |            |
| Unweighted sample   | 410        | 461        | 435        | 489        |
| Weighted population | 5,295,839  | 5,262,717  | 5,408,646  | 6,374,760  |
| Weighted column %   | 21.0%      | 20.3%      | 19.9%      | 22.4%      |
| 60-64               |            |            |            |            |
| Unweighted sample   | 541        | 535        | 523        | 650        |
| Weighted population | 4,554,238  | 4,686,774  | 4,434,327  | 5,279,472  |
| Weighted column %   | 18.1%      | 18.1%      | 16.3%      | 18.5%      |
| 65-69               |            |            |            |            |
| Unweighted sample   | 367        | 405        | 426        | 454        |
| Weighted population | 3,070,650  | 3,610,579  | 4,333,554  | 3,939,321  |
| Weighted column %   | 12.2%      | 14.0%      | 16.0%      | 13.8%      |
| 70-74               |            |            |            |            |
| Unweighted sample   | 304        | 346        | 334        | 367        |
| Weighted population | 2,559,649  | 2,817,572  | 2,857,724  | 3,226,419  |
| Weighted column %   | 10.2%      | 10.9%      | 10.5%      | 11.3%      |
| ≥75                 |            |            |            |            |
| Unweighted sample   | 581        | 558        | 620        | 681        |
| Weighted population | 4,285,011  | 4,269,241  | 4,768,146  | 4,999,443  |
| Weighted column %   | 17.0%      | 16.5%      | 17.5%      | 17.6%      |
